# Supplementary material
Source: ML conference proceedings conference paper supplement (https://openaccess.thecvf.com/content/ICCV2023/html/Kim_SCOB_Universal_Text_ICCV_2023_paper.html)
Supplement: Supplementary file 1 [file Kim_SCOB_Universal_Text_ICCV_2023_supplemental.pdf]

# Supplemental Material to

## SCOB: Universal Text Understanding via Character-wise Supervised Contrastive Learning with Online Text Rendering for Bridging Domain Gap

### Content

This supplementary material provides details of pre-training experiments (Section 1), detailed settings of fine-tuning (Section 2), and more diverse samples of t-SNE [36] (Section 3).

## 1. Pre-trainings

### 1.1. Details of Pre-training

In Pix2Seq [4], sequence augmentation was applied to add a noise token to the sequence. On the other hand, we do not apply sequence augmentation to our model because we could not empirically observe the performance improvement with noise tokens. The learning rate is set to  $1e-4$  with a cosine decay scheduler [24] where a warm-up step is 100K steps. For the data augmentation, we adopt the widely used augmentation methods for OCR as follows: random crop following CRAFT [1], random rotation, random resize options (e.g., bilinear, nearest neighbor, bicubic, and Lanczos interpolation), and photometric distortion.

The detailed settings of the online text renderer are as follows. The range of resolution is from 400 to 768, the range of background RGB values is from 151 to 255, and the Gaussian blur radius value is 0 to 1.8 with a probability of 0.2. Figure 3 provides image samples generated in a one-to-one correspondence to the ICDAR2015 [13] test set using the renderer.

### 1.2. Instability of *Text-read*

In this section, we present experimental results about the instability of *text-read* when the model is pre-trained with both VDU and STU data. As significant performance differences are observed in the early stages of training, we conduct a precise experiment. Specifically, we pre-train the model using IIT-CDIP and scene text datasets for 200K steps with a batch size of 16. For fine-tuning OCR, we employ scene text datasets used in the main paper and fine-tune the models for 50K training steps with 8 batch size that consists of  $1920 \times 1920$  resolution images.

Figure 1 shows the convergence of two distinct reading

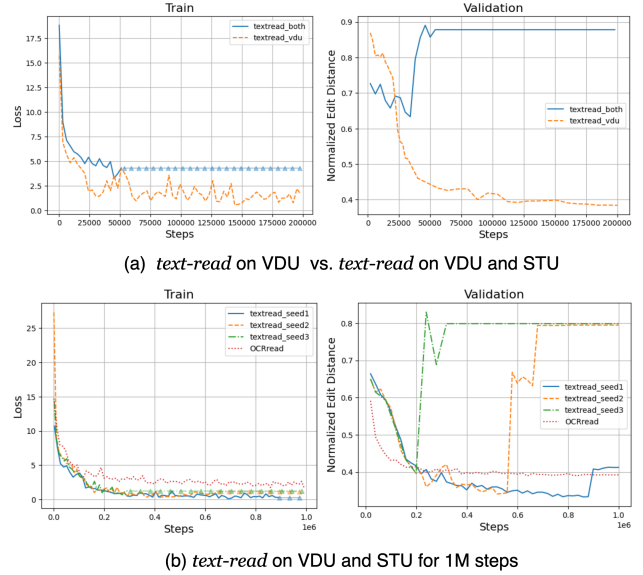

Figure 1. Graphs of training loss and validation score during *text-read* pre-training. (a) shows instability of *text-read* using VDU and STU together. (b) also shows instability of *text-read* using VDU and STU together for 1M steps compared to *OCR-read*. Validation score is normalized edit distance. Upper triangle in loss graph means NaN (not a number).

approaches: *text-read* and *OCR-read*. Specifically, Figure 1 (a) shows that the loss and validation score converge stably when only VDU data is used as a training set. However, the model fails to generate appropriate sequences during validation and experiences NaN (not a number) loss when both VDU and STU datasets are used for training. Figure 1 (b) depicts the *text-read* pre-training process for 1M steps, which has failed across various seed values. On the other hand, *OCR-read* displays more stable convergence patterns despite its loss and validation score converging at a slightly higher level due to sensitivity issues such as coordinate token output. The sole difference between *OCR-read* and *text-read* lies in the presence or absence of coordinate prediction. Also, the distinction between VDU and STU domains is based on whether text is present in the natural scene back-

| Method                           | KIE       | Document VQA | OCR       |           |               | Scene Text VQA |            |
|----------------------------------|-----------|--------------|-----------|-----------|---------------|----------------|------------|
|                                  | CORD [31] | DocVQA [27]  | IC13 [14] | IC15 [13] | TotalText [6] | TextVQA [33]   | ST-VQA [2] |
| <i>Text-read</i> on both domains | 80.7      | 45.7         | 66.7      | 20.3      | 43.4          | 42.1           | 52.2       |
| <i>Text-read</i> on VDU          | 85.3      | 53.1         | 77.1      | 35.8      | 56.1          | 42.8           | 53.2       |

Table 1. The performance evaluation for *text-read* according to pre-training domains. We report the end-to-end recognition F-measure scores on IC13, IC15, and TotalText evaluated with strong, strong, and full lexicons, respectively

ground. We posit that a domain gap exists between VDU and STU, contributing to the instability of *text-read*.

To evaluate the performance of the pre-trained weights on downstream tasks, we fine-tuned *text-read* on four downstream tasks using pre-trained weights for 200K steps ((a) of Figure 1). Table 1 indicates that *text-read* pre-training on both domains fails to transfer learning on downstream tasks. The performance of *text-read* using both domains is relatively lower than that of *text-read* using only the VDU domain. This result further supports that *text-read* is unstable in both domains, deteriorating the achievement of a reliable pre-training.

### 1.3. Details of Ablation Study

As presented in Table 4 of the main paper, we conduct an ablation study with five models. All models are pre-trained for 1M steps. Table 2 provides detailed performance of benchmarks. Details are as follows:

- A:  $W_{\text{OCR-read}}$ .
- B: We introduce augmentation for generating multi-view images. The augmentation types are random rotation, image resize, color jittering, converting into the gray channel, and Gaussian blur. Geometric augmentations such as random rotation and image resize are applied with low intensity. The model is trained via Eq. 1 and Eq. 2.
- C: The real and rendered data are the input data of the model. The model is trained via Eq. 3, and the renderer is the same as SCOB.
- D:  $W_{\text{OCR-read}}$  with SCOB.
- E: The model is trained under the fully supervised learning. Thus, the coordinate information of real data is employed for pre-training.

We fine-tune 4 downstream tasks such as KIE, document VQA, OCR, and scene text VQA. For the tasks of VQA, we evaluate the validation set, because multiple submissions of the test dataset on the leaderboard can be regarded as cheating. We fine-tuned models for 50K steps using 16 batch size on VQAs for efficiency. For the OCR tasks, we employ intermediate fine-tuned models, which are evaluated on the test dataset.

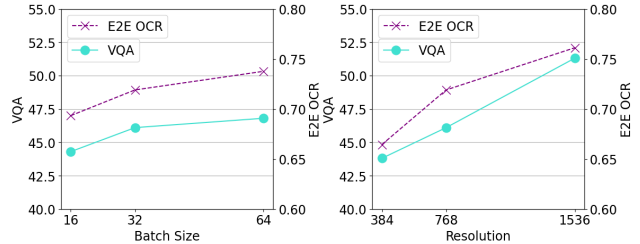

Figure 2. The results for VQA (average scores of DocVQA, TextVQA, STVQA) and E2E OCR (average F1 scores of IC13, IC15, TotalText) across batch sizes (16, 32, 64) and resolutions (384, 768, 1536). A fixed resolution of 768 and batch size of 32 were used respectively. The experiment involved 200K steps of *OCR-read* pre-training and 50K of fine-tuning.

### 1.4. Performance Trends with Batch Size and Resolution

We present the experimental results of the effect of batch size and resolution changes on downstream task performance under the *OCR-read* pre-training setting in Figure 2. The results confirm an enhancement in performance as both batch size and resolution increase. We identified a performance gap between SCOB and the current SoTA. However, in this paper, we delve into the composite domain of VDU and STU to compare the performance of pre-training tasks, verifying the superiority of SCOB under identical pre-training environments. Based on these results, we expect that there is latent potential within the model, likely to be uncovered through the careful tuning of factors such as scale, learning schedule, and resolution.

## 2. Fine-tunings

### 2.1. Details of Fine-tuning

In the fine-tuning stage, we use  $1920 \times 1920$  image resolution to recognize text well, and intermediate training follows it. Moreover, we empirically confirmed that auxiliary loss [3] accelerates the convergence of the recognition performance of OCR. Thus we apply the auxiliary loss to all layers of the decoder in the fine-tuning.

Table 3 provides our detailed settings for fine-tuning. We fine-tune all models using Adam optimizer with a cosine decay scheduler where the warm-up step is set to 10% of training steps. We have not widely explored the hyperparameters, such as the batch ratio of the dataset, gradient clipping value, and learning rate. We believe more hyperparameter

| Method                   | KIE         | Document VQA | OCR         |             |               | Scene Text VQA |             |
|--------------------------|-------------|--------------|-------------|-------------|---------------|----------------|-------------|
|                          | CORD [31]   | DocVQA [27]  | IC13 [14]   | IC15 [13]   | TotalText [6] | TextVQA [33]   | ST-VQA [2]  |
| A. W <sub>OCR-read</sub> | 88.2        | 55.1         | 94.3        | 74.2        | 75.5          | 55.4           | 59.2        |
| B. A w/ SupCon           | 87.7        | 50.0         | 93.4        | 76.5        | <b>76.7</b>   | 53.0           | 60.6        |
| C. A w/ rendering        | 88.0        | 47.8         | 94.1        | 76.4        | 75.4          | 50.8           | 57.7        |
| D. A w/ SCOB             | <b>88.5</b> | <b>55.5</b>  | <b>95.0</b> | 77.6        | 76.5          | <b>56.2</b>    | 62.6        |
| E. D w/ full annotation  | 86.8        | 55.1         | 94.7        | <b>77.7</b> | 75.5          | 56.1           | <b>63.1</b> |

Table 2. Ablation study on the proposed components. For the evaluation of OCR, we report the end-to-end recognition F-measure scores on IC13, IC15, and TotalText evaluated with strong, strong, and full lexicons, respectively.

| Task                    | Steps | Batch Size | LR   | GC   | DPL | MSL  | Resolution | Batch Ratio of Fine-tuning Dataset                                                                                                                                          |
|-------------------------|-------|------------|------|------|-----|------|------------|-----------------------------------------------------------------------------------------------------------------------------------------------------------------------------|
| Table Reconstruction*   | 400K  | 16         | 5e-5 | 1.0  | 6   | 3072 | 768        | <b>1.0</b> PubTabNet [39]                                                                                                                                                   |
| KIE                     | 200K  | 16         | 3e-5 | 1.0  | 0   | 512  | 1920       | <b>1.0</b> CORD [31]                                                                                                                                                        |
| Document Classification | 1M    | 16         | 2e-5 | 1.0  | 0   | 8    | 1920       | <b>1.0</b> RVL-CDIP [10]                                                                                                                                                    |
| Document VQA            | 100K  | 16         | 3e-5 | 0.25 | 0   | 512  | 1920       | <b>0.65</b> DocVQA [27], <b>0.07</b> TextVQA [33], <b>0.07</b> ST-VQA [2], <b>0.07</b> OCRVQA [28], <b>0.07</b> VizWiz [9], <b>0.07</b> VQAv2 [7]                           |
| Infographics VQA        | 100K  | 16         | 3e-5 | 0.25 | 0   | 512  | 1920       | <b>0.58</b> InfoVQA [26], <b>0.07</b> DocVQA [27], <b>0.07</b> TextVQA [33], <b>0.07</b> ST-VQA [2], <b>0.07</b> OCRVQA [28], <b>0.07</b> VizWiz [9], <b>0.07</b> VQAv2 [7] |
| Layout Analysis         | 100K  | 16         | 2e-4 | 1.0  | 0   | 512  | 1536       | <b>1.0</b> PubLayNet [40]                                                                                                                                                   |
| Scene Text VQA          | 100K  | 16         | 3e-5 | 0.25 | 0   | 512  | 1920       | <b>0.2</b> DocVQA [27], <b>0.2</b> TextVQA [33], <b>0.2</b> ST-VQA [2], <b>0.2</b> OCRVQA [28], <b>0.1</b> VizWiz [9], <b>0.1</b> VQAv2 [7]                                 |
| Scene Text OCR*         | 100K  | 16         | 5e-5 | 1.0  | 0   | 512  | 2560       | <b>0.3</b> HireText [23], <b>0.3</b> TextOCR [34], <b>0.09</b> TotalText [6], <b>0.09</b> OpenImagesv6 [19], <b>0.01</b> IC13 [14], <b>0.01</b> IC15 [13]                   |

Table 3. Detailed settings of downstream tasks. For the batch ratio, we represent the cell as ‘*batch ratio of dataset dataset*’. Abbr: LR: learning rate, GC: gradient clipping, DPL: decoder prune layer, MSL: maximum sequence length of decoder. \* denotes that not using intermediate training.

exploration will result in better performance. For the input image resolution, we determine the resolution considering the original image size and comparisons of the input size.

Here, we supplement more details of specific downstream tasks. To help understand downstream tasks, we provide the examples of image and its ground truth sequence of our model in Figures 4 and 5.

**Table Reconstruction.** In table reconstruction, the model should decode table structures and contents in the cell. Thus, the maximum sequence length of the decoder is set to 3072, which makes pruning 6 Transformer layers in the decoder to reserve batch size 16. In table reconstruction, the input can be categorized as image and PDF.

**Layout Analysis.** PubLayNet [40] is a dataset annotated with a bounding box format and 5 document layout categories: text, title, list, figure, and table. This includes 335,703 training images and 11,245 validation images. We fine-tune the train set and evaluate the validation set, following LayoutLMv3 [12].

**Scene Text OCR.** To evaluate the performance of our OCR model, we assess its ability to recognize text in different benchmarks, including ICDAR2013 [14], ICDAR2015 [13], and TotalText [6]. However, since each dataset has a distinct format for coordinate annotation, we conduct short annotation fine-tuning specifically for

IC15 and TotalText to mitigate any discrepancies. Table 5 presents the performance of our model on IC13, IC15, and TotalText with additional lexicon conditions. Note that the OCR performance reported in Table 2 is obtained before annotation fine-tuning.

## 2.2. Comparison with More Models

Our methodologies are compared with more recent approaches such as UDOP [35], PaLI [5], and GIT2 [37] as presented in Table 4. UDOP and PaLI-17B exhibit superior performance across various benchmark criteria. These results show the potential of leveraging OCR to enhance the performance of generative models, albeit with concomitant resource implications. Based on PaLI-3B and PaLI-17B results, increasing the model size can also be a significant factor in the performance. Furthermore, it is noteworthy that PaLI employs a form of *text-read* task as a pre-training method. In this context, we believe that the integration of our SCOB approach holds the potential to further amplify the performance of PaLI.

## 2.3. Comparison on Layout Analysis

Table 7 shows the performance of PubLayNet [40]. Our models demonstrate comparable performance to previous methods. Importantly, our models can handle multiple downstream tasks using a single pipeline, namely the

| Method                         | #GPUs      | Universal Text Understanding Downstream Tasks |             |                         |              |                    |                 |                    |                    |                    |                    |             |
|--------------------------------|------------|-----------------------------------------------|-------------|-------------------------|--------------|--------------------|-----------------|--------------------|--------------------|--------------------|--------------------|-------------|
|                                |            | Table Reconstruction                          | KIE         | Document Classification | Document VQA |                    | Layout Analysis | Scene Text OCR     |                    |                    | Scene Text VQA     |             |
|                                |            | PubTabNet [39]                                | CORD [31]   | RVL-CDIP [10]           | DocVQA [27]  | InfoVQA [26]       | PubLayNet [40]  | IC13 [14]          | IC15 [13]          | TotalText [6]      | TextVQA [33]       | ST-VQA [2]  |
| W <sub>OCR-read</sub>          | 8×V100     | 96.0                                          | 88.2        | 94.2                    | 56.1         | 22.7               | 93.8            | 95.8               | 89.6               | 84.9               | 55.4               | <b>62.9</b> |
| W <sub>OCR-read</sub> w/ SCOB  | 8×V100     | 95.9 (-0.1)                                   | 88.5 (+0.3) | 94.6 (+0.4)             | 60.2 (+4.1)  | <b>28.5 (+5.8)</b> | 93.9 (+0.1)     | <b>96.6 (+0.8)</b> | <b>90.9 (+1.3)</b> | <b>86.0 (+1.1)</b> | <b>56.2 (+0.8)</b> | 62.6 (-0.3) |
| W <sub>text-read</sub>         | 8×V100     | <b>96.2</b>                                   | 85.5        | 94.4                    | 57.0         | 25.2               | 93.6            | 96.0               | 87.2               | 83.7               | 49.3               | 57.2        |
| W <sub>text-read</sub> w/ SCOB | 8×V100     | 96.0 (-0.2)                                   | 87.4 (+1.9) | 94.3 (-0.1)             | 59.6 (+2.6)  | 27.5 (+2.3)        | 93.9 (+0.3)     | 96.0 (+0.0)        | 90.2 (+3.0)        | 85.3 (+1.6)        | 54.4 (+5.1)        | 61.2 (+4.0) |
| TableFormer [29]               | n/a        | 93.7                                          | -           | -                       | -            | -                  | -               | -                  | -                  | -                  | -                  | -           |
| Donut <sub>proto</sub> [16]    | 8×V100     | -                                             | 85.4        | 94.5                    | 47.1         | 10.2*              | -               | -                  | -                  | -                  | -                  | -           |
| Donut [16]                     | 64×A100    | -                                             | <b>90.9</b> | 95.3                    | 67.5         | 24.4*              | -               | -                  | -                  | -                  | 36.8*              | 61.5*       |
| LayoutLMv3 [12]                | 32×V100    | -                                             | 84.4*       | <b>95.5</b>             | <b>83.4</b>  | -                  | <b>95.1</b>     | -                  | -                  | -                  | -                  | -           |
| SPTS [32]                      | 32×V100    | -                                             | -           | -                       | -            | -                  | -               | 93.3               | 77.5               | 82.4               | -                  | -           |
| PreSTU [15]                    | n/a        | -                                             | -           | -                       | -            | -                  | -               | -                  | -                  | -                  | 54.5               | 62.6        |
| UDOP [35]                      | n/a        | -                                             | -           | <b>96.0</b>             | <b>84.7</b>  | <b>47.4</b>        | -               | -                  | -                  | -                  | -                  | -           |
| PaLI-3B [5]                    | n/a        | -                                             | -           | -                       | -            | -                  | -               | -                  | -                  | -                  | 60.1               | 67.5        |
| PaLI-17B [5]                   | 1024×TPUv4 | -                                             | -           | -                       | -            | -                  | -               | -                  | -                  | -                  | <b>71.8</b>        | <b>77.1</b> |
| GIT2 [37]                      | n/a        | -                                             | -           | -                       | -            | -                  | -               | -                  | -                  | -                  | 68.4               | 75.1        |

Table 4. Comparison including additional SoTA models: UDOP [35], PaLI [5], and GIT2 [37]. Note that UDOP and PaLIs employ the result of OCR as an input. The total number of training parameter of UDOP, PaLI-3B, PaLI-17B and GIT2 are 794M, 3B, 17B and 5.1B, respectively. The table shows the extensive benchmarks for text-related downstream tasks. “#GPUs” denotes the total number of employed GPUs for pre-training. The left section is VDU tasks, and the right section is STU tasks. The best performance is represented in **bold**. Note that Donut was pre-trained on IIT-CDIP and SynthDoG, while Donut<sub>proto</sub> was pre-trained on SynthDoG [16]. \* denotes the performance results of our fine-tuning, conducted following the author’s guidelines.

| Method                         | IC13 End-to-End |             |             |             | IC15 End-to-End |             |             |             | Total-Text  |             |
|--------------------------------|-----------------|-------------|-------------|-------------|-----------------|-------------|-------------|-------------|-------------|-------------|
|                                | <i>N</i>        | <i>G</i>    | <i>W</i>    | <i>S</i>    | <i>N</i>        | <i>G</i>    | <i>W</i>    | <i>S</i>    | <i>N</i>    | <i>F</i>    |
| W <sub>OCR-read</sub>          | 90.4            | 91.8        | 93.7        | 94.3        | 66.4            | 69.4        | 73.3        | 75.7        | 72.6        | 78.9        |
| W <sub>OCR-read</sub> w/ SCOB  | <b>92.2</b>     | <b>93.1</b> | <b>94.6</b> | <b>95.0</b> | <b>71.9</b>     | <b>74.2</b> | <b>76.6</b> | <b>78.8</b> | <b>75.1</b> | <b>79.8</b> |
| W <sub>text-read</sub>         | 87.7            | 89.2        | 91.1        | 91.8        | 55.6            | 58.7        | 61.3        | 63.3        | 69.1        | 75.1        |
| W <sub>text-read</sub> w/ SCOB | 88.6            | 90.0        | 91.7        | 92.1        | 59.3            | 61.1        | 63.1        | 65.5        | 73.1        | 78.2        |

Table 5. The end-to-end recognition results on ICDAR2013, ICDAR2015, and Total-Text. *Abbr.* *N, G, W, S, F*: none, generic, weak, strong, and full lexicons, respectively.

sequence generation framework, which distinguishes them from previous methods that require specific architectural designs for each task.

## 2.4. Comparison on OCR

Table 5 provides the F-measure scores for the end-to-end OCR benchmark on scene text. Our model achieves state-of-the-art performance in IC13 and shows comparable results in IC15 and Total-Text compared to the alternative state-of-the-art methods.

### 2.4.1 W<sub>OCR-read</sub> vs. SPTS

Our W<sub>OCR-read</sub> architecture is similar to SPTS [32], but outperforms it significantly. Notably, W<sub>OCR-read</sub> and SPTS differ in parameters (202M vs. 36M), dataset, encoder backbone, and resolution. SPTS pre-trains on Curved Synthetic Dataset 150K [22], MLT-2017 [30], ICDAR2013 [14], ICDAR2015 [13], and TotalText [6], followed by fine-tuning on each target dataset. In contrast, W<sub>OCR-read</sub> generalizes not only to OCR but also to diverse downstream tasks, using

| Method                         | $G$ | IC13 [14]   |             | IC15 [13]   |             | TotalText [6] |             |
|--------------------------------|-----|-------------|-------------|-------------|-------------|---------------|-------------|
|                                |     | $N$         | $S$         | $N$         | $S$         | $N$           | $F$         |
| Box-based Localization         |     |             |             |             |             |               |             |
| MTSv2 [25]                     |     | 80.3        | 93.3        | -           | 83.0        | 65.3          | 77.4        |
| MTSv3 [21]                     |     | 80.2        | -           | -           | 83.3        | 71.2          | 78.4        |
| DEER [17]                      |     | -           | -           | 71.7        | 82.7        | 74.8          | 81.3        |
| SwinTextSpotter [11]           |     | -           | -           | -           | 83.9        | 51.8          | 77.0        |
| TESTR [38]                     |     | -           | -           | 65.3        | 85.2        | 73.3          | 83.9        |
| TTS [18]                       |     | -           | -           | -           | <b>85.2</b> | <b>75.6</b>   | <b>84.4</b> |
| $W_{\text{OCR-read}}$          | ✓   | 90.4        | 94.3        | 66.4        | 75.7        | 72.6          | 78.9        |
| $W_{\text{OCR-read}}$ w/ SCOB  | ✓   | <b>92.2</b> | <b>95.0</b> | <b>71.9</b> | 78.8        | 75.1          | 79.8        |
| $W_{\text{text-read}}$         | ✓   | 87.7        | 91.8        | 55.6        | 63.3        | 69.1          | 75.1        |
| $W_{\text{text-read}}$ w/ SCOB | ✓   | 88.6        | 92.1        | 59.3        | 65.5        | 73.1          | 78.2        |
| Point-based Localization       |     |             |             |             |             |               |             |
| SPTS [32]                      | ✓   | -           | 93.3        | -           | 79.5        | 74.2          | 82.4        |
| $W_{\text{OCR-read}}$ w/ SCOB  | ✓   | -           | <b>96.6</b> | -           | <b>90.9</b> | <b>78.9</b>   | <b>86.0</b> |

Table 6. The end-to-end recognition F-measure results on ICDAR2013 [14], ICDAR2015 [13] and TotalText [6]. *Abbr.* *G*: generation model, *N, S, F*: none, strong and full lexicon, respectively.

various datasets of VDU and STU. While SPTS employs ResNet-50 and Transformer 6 layers as its encoder backbone, we use the Swin-transformer. Moreover, SPTS adopts 1600 resolution, while W<sub>OCR-read</sub> uses 768 resolution in pre-training and 2560 resolution in fine-tuning. Notably, the resolution has a significant impact on OCR performance. We also accelerate end-to-end recognition convergence using the auxiliary loss [3]. Unlike SPTS, we do not use word

| Method                         | #Param | $G$ | Category |       |      |       |        | mAP         |
|--------------------------------|--------|-----|----------|-------|------|-------|--------|-------------|
|                                |        |     | Text     | Title | List | Table | Figure |             |
| PubLayNet [40]                 | -      |     | 91.6     | 84.0  | 88.6 | 96.0  | 94.9   | 91.0        |
| LayoutLMv3 [12]                | 133M   |     | 94.5     | 90.6  | 95.5 | 97.9  | 97.0   | <b>95.1</b> |
| UDoc [8]                       | 272M   |     | 93.9     | 88.5  | 93.7 | 97.3  | 96.4   | 93.9        |
| DiT [20]                       | 304M   |     | 94.4     | 89.3  | 96.0 | 97.8  | 97.2   | 94.9        |
| $W_{\text{OCR-read}}$          | 202M   | ✓   | 93.1     | 88.4  | 92.9 | 97.3  | 97.1   | 93.8        |
| $W_{\text{OCR-read}}$ w/ SCOB  | 202M   | ✓   | 93.2     | 88.8  | 93.7 | 97.0  | 96.6   | 93.9        |
| $W_{\text{text-read}}$         | 202M   | ✓   | 93.2     | 88.8  | 92.4 | 97.1  | 96.7   | 93.6        |
| $W_{\text{text-read}}$ w/ SCOB | 202M   | ✓   | 93.5     | 89.1  | 93.0 | 96.9  | 96.8   | 93.9        |

Table 7. The public benchmark on PubLayNet [40] validation set (mAP @ IOU [0.50:0.95]) for document layout analysis. *Abbr.*  $G$ : generation model.

| Models                 | TEDS | Model Params. | OCR Params. | Time (s/img) |
|------------------------|------|---------------|-------------|--------------|
| LayoutLMv3 + EasyOCR   | 56.2 | 133M          | 25M         | 0.7          |
| LayoutLMv3 + PaddleOCR | 60.5 | 133M          | 12M         | 0.3          |
| LayoutLMv3 + MSAzure   | 84.4 | 133M          | n/a         | 1.8          |
| $W_{\text{OCR-read}}$  | 88.2 | 202M          | None        | 1.1          |

Table 8. The performance and inference time on CORD testset. LayoutLMv3 can be combined with various OCR models.

instance padding, allowing our model to learn many more words with the same decoder sequence length by saving redundant decoding sequences. While word instance padding may help the model converge at the early training stages, it does not significantly improve final performance.

To compare two methods that have different outputs for coordinate information, the central point of the box of our model is taken as a single point, and we follow the SPTS evaluation protocol. Figures 6-8 also present the qualitative comparisons:  $W_{\text{OCR-read}}$ ,  $W_{\text{OCR-read}}$  with SCOB, and SPTS. As can be seen,  $W$  is more robust to small or dense words. As shown in Figure 8,  $W$  also predicts well for curved text.

## 2.5. Comparison with LayoutLMv3

As shown in Table 8, we present the performance of LayoutLMv3 based on different OCR models. When employing lightweight OCR models like EasyOCR\* and PaddleOCR†, LayoutLMv3 demonstrates improved speed compared to our model. However, it is important to note that the scores obtained with these lightweight OCR models are significantly inferior when compared to the utilization of a commercial OCR model like MSAzure‡.

\*<https://github.com/JaidedAI/EasyOCR>

†<https://github.com/PaddlePaddle/PaddleOCR>

‡<https://learn.microsoft.com/en-us/azure/cognitive-services/computer-vision/overview-ocr>

## 3. Visualization of t-SNE

Figures 9 and 10 provide more diverse results visualized by t-SNE [36] with various perplexities. To color-code points according to ground truth classes in sequence generation architecture, we use a teacher-forcing scheme. Note that Figures 9 and 10 use pre-trained and fine-tuned models, respectively.

As shown in the figures, our visualizations show similar trends regardless of perplexity values, but visualization for pre-trained models have a different tendency with fine-tuned models. The ICDAR2015 dataset contains small and blurry texts that can be inaccurately identified in low-resolution images. Considering models are pre-trained with small resolution ( $768 \times 768$ ) images, all models are inherently incapable of identifying very small and blurry texts. These texts might be visualized as multi-colored clusters composed of different classes in Figure 9. In  $W_{\text{OCR-read}}$  with SCOB and  $W_{\text{OCR-read}}$  with online text rendering, a large multi-colored cluster remains, but scattered small multi-colored clusters disappear. This could be because our online text renderer makes the model robust against small and blurry texts by rendering texts with various image augmentations. As can be seen in Figure 10, our  $W_{\text{OCR-read}}$  with SCOB extracts the latent representations more discriminatively than other models in the embedding space.

## References

- [1] Youngmin Baek, Bado Lee, Dongyoon Han, Sangdoo Yun, and Hwalsuk Lee. Character region awareness for text detection. In *Proceedings of the IEEE/CVF Conference on Computer Vision and Pattern Recognition*, pages 9365–9374, 2019. 1
- [2] Ali Furkan Biten, Ruben Tito, Andres Mafla, Lluís Gomez, Marçal Rusinol, Ernest Valveny, CV Jawahar, and Dimosthenis Karatzas. Scene text visual question answering. In *Proceedings of the IEEE/CVF international conference on computer vision*, pages 4291–4301, 2019. 2, 3, 4
- [3] Nicolas Carion, Francisco Massa, Gabriel Synnaeve, Nicolas Usunier, Alexander Kirillov, and Sergey Zagoruyko. End-to-end object detection with transformers. In *European conference on computer vision*, pages 213–229. Springer, 2020. 2, 4
- [4] Ting Chen, Saurabh Saxena, Lala Li, David J Fleet, and Geoffrey Hinton. Pix2seq: A language modeling framework for object detection. *arXiv preprint arXiv:2109.10852*, 2021. 1
- [5] Xi Chen, Xiao Wang, Soravit Changpinyo, AJ Piergiovanni, Piotr Padlewski, Daniel Salz, Sebastian Goodman, Adam Grycner, Basil Mustafa, Lucas Beyer, Alexander Kolesnikov, Joan Puigcerver, Nan Ding, Keran Rong, Hassan Akbari, Gaurav Mishra, Linting Xue, Ashish V Thapliyal, James Bradbury, Weicheng Kuo, Mojtaba Seyedhosseini, Chao Jia, Burcu Karagol Ayan, Carlos Riquelme Ruiz, Andreas Peter Steiner, Anelia Angelova, Xiaohua Zhai, Neil Houlsby, and Radu Soricut. PaLI: A jointly-scaled multilingual language-

- image model. In *The Eleventh International Conference on Learning Representations*, 2023. 3, 4
- [6] Chee Kheng Ch'ng and Chee Seng Chan. Total-text: A comprehensive dataset for scene text detection and recognition. In *2017 14th IAPR international conference on document analysis and recognition (ICDAR)*, volume 1, pages 935–942. IEEE, 2017. 2, 3, 4
- [7] Yash Goyal, Tejas Khot, Douglas Summers-Stay, Dhruv Batra, and Devi Parikh. Making the v in vqa matter: Elevating the role of image understanding in visual question answering. In *Proceedings of the IEEE conference on computer vision and pattern recognition*, pages 6904–6913, 2017. 3
- [8] Jiuxiang Gu, Jason Kuen, Vlad I Morariu, Handong Zhao, Nikolaos Barmpalios, Rajiv Jain, Ani Nenkova, and Tong Sun. Unified pretraining framework for document understanding. *arXiv preprint arXiv:2204.10939*, 2022. 5
- [9] Danna Gurari, Qing Li, Abigale J Stangl, Anhong Guo, Chi Lin, Kristen Grauman, Jiebo Luo, and Jeffrey P Bigham. Vizwiz grand challenge: Answering visual questions from blind people. In *Proceedings of the IEEE conference on computer vision and pattern recognition*, pages 3608–3617, 2018. 3
- [10] Adam W Harley, Alex Ufkes, and Konstantinos G Derpanis. Evaluation of deep convolutional nets for document image classification and retrieval. In *2015 13th International Conference on Document Analysis and Recognition (ICDAR)*, pages 991–995. IEEE, 2015. 3, 4
- [11] Mingxin Huang, Yuliang Liu, Zhenghao Peng, Chongyu Liu, Dahua Lin, Shenggao Zhu, Nicholas Yuan, Kai Ding, and Lianwen Jin. Swintextspotter: Scene text spotting via better synergy between text detection and text recognition. In *Proceedings of the IEEE/CVF Conference on Computer Vision and Pattern Recognition*, pages 4593–4603, 2022. 4
- [12] Yupan Huang, Tengchao Lv, Lei Cui, Yutong Lu, and Furu Wei. Layoutlmv3: Pre-training for document ai with unified text and image masking. *arXiv preprint arXiv:2204.08387*, 2022. 3, 4, 5
- [13] Dimosthenis Karatzas, Lluís Gomez-Bigorda, Angelos Nicolaou, Suman Ghosh, Andrew Bagdanov, Masakazu Iwamura, Jiri Matas, Lukas Neumann, Vijay Ramaseshan Chandrasekhar, Shijian Lu, et al. Icdar 2015 competition on robust reading. In *2015 13th international conference on document analysis and recognition (ICDAR)*, pages 1156–1160. IEEE, 2015. 1, 2, 3, 4
- [14] Dimosthenis Karatzas, Faisal Shafait, Seiichi Uchida, Masakazu Iwamura, Lluís Gomez i Bigorda, Sergi Robles Mestre, Joan Mas, David Fernandez Mota, Jon Almazan Almazan, and Lluís Pere De Las Heras. Icdar 2013 robust reading competition. In *2013 12th international conference on document analysis and recognition*, pages 1484–1493. IEEE, 2013. 2, 3, 4
- [15] Jihyung Kil, Soravit Changpinyo, Xi Chen, Hexiang Hu, Sebastian Goodman, Wei-Lun Chao, and Radu Soricut. Prestu: Pre-training for scene-text understanding. *arXiv preprint arXiv:2209.05534*, 2022. 4
- [16] Geewook Kim, Teakgyu Hong, Moonbin Yim, JeongYeon Nam, Jinyoung Park, Jinyeong Yim, Wonseok Hwang, Sangdoo Yun, Dongyoon Han, and Seunghyun Park. Ocr-free document understanding transformer. In *European Conference on Computer Vision (ECCV)*, 2022. 4
- [17] Seonghyeon Kim, Seung Shin, Yoonsik Kim, Han-Cheol Cho, Taeho Kil, Jaeheung Surh, Seunghyun Park, Bado Lee, and Youngmin Baek. Deer: Detection-agnostic end-to-end recognizer for scene text spotting. *arXiv preprint arXiv:2203.05122*, 2022. 4
- [18] Yair Kittenplon, Inbal Lavi, Sharon Fogel, Yarin Bar, R Manmatha, and Pietro Perona. Towards weakly-supervised text spotting using a multi-task transformer. In *Proceedings of the IEEE/CVF Conference on Computer Vision and Pattern Recognition*, pages 4604–4613, 2022. 4
- [19] Ivan Krasin, Tom Duerig, Neil Alldrin, Vittorio Ferrari, Sami Abu-El-Haija, Alina Kuznetsova, Hassan Rom, Jasper Uijlings, Stefan Popov, Shahab Kamali, Matteo Mallocci, Jordi Pont-Tuset, Andreas Veit, Serge Belongie, Victor Gomes, Abhinav Gupta, Chen Sun, Gal Chechik, David Cai, Zheyun Feng, Dhyanesh Narayanan, and Kevin Murphy. Openimages: A public dataset for large-scale multi-label and multi-class image classification. *Dataset available from <https://storage.googleapis.com/openimages/web/index.html>*, 2017. 3
- [20] Junlong Li, Yiheng Xu, Tengchao Lv, Lei Cui, Cha Zhang, and Furu Wei. Dit: Self-supervised pre-training for document image transformer. *arXiv preprint arXiv:2203.02378*, 2022. 5
- [21] Minghui Liao, Guan Pang, Jing Huang, Tal Hassner, and Xiang Bai. Mask textspotter v3: Segmentation proposal network for robust scene text spotting. In *European Conference on Computer Vision*, pages 706–722. Springer, 2020. 4
- [22] Yuliang Liu, Hao Chen, Chunhua Shen, Tong He, Lianwen Jin, and Liangwei Wang. Abcnet: Real-time scene text spotting with adaptive bezier-curve network. In *proceedings of the IEEE/CVF conference on computer vision and pattern recognition*, pages 9809–9818, 2020. 4
- [23] Shangbang Long, Siyang Qin, Dmitry Panteleev, Alessandro Bissacco, Yasuhisa Fujii, and Michalis Raptis. Towards end-to-end unified scene text detection and layout analysis. In *Proceedings of the IEEE/CVF Conference on Computer Vision and Pattern Recognition*, 2022. 3
- [24] Ilya Loshchilov and Frank Hutter. SGDR: Stochastic gradient descent with warm restarts. In *International Conference on Learning Representations (ICLR)*, 2017. 1
- [25] Pengyuan Lyu, Minghui Liao, Cong Yao, Wenhao Wu, and Xiang Bai. Mask textspotter: An end-to-end trainable neural network for spotting text with arbitrary shapes. In *Proceedings of the European Conference on Computer Vision (ECCV)*, pages 67–83, 2018. 4
- [26] Minesh Mathew, Viraj Bagal, Rubèn Tito, Dimosthenis Karatzas, Ernest Valveny, and CV Jawahar. Infographicvqa. In *Proceedings of the IEEE/CVF Winter Conference on Applications of Computer Vision*, pages 1697–1706, 2022. 3, 4
- [27] Minesh Mathew, Dimosthenis Karatzas, and CV Jawahar. Docvqa: A dataset for vqa on document images. In *Proceedings of the IEEE/CVF winter conference on applications of computer vision*, pages 2200–2209, 2021. 2, 3, 4

- [28] Anand Mishra, Shashank Shekhar, Ajeet Kumar Singh, and Anirban Chakraborty. Ocr-vqa: Visual question answering by reading text in images. In *2019 international conference on document analysis and recognition (ICDAR)*, pages 947–952. IEEE, 2019. 3
- [29] Ahmed Nassar, Nikolaos Livathinos, Maksym Lysak, and Peter Staar. Tableformer: Table structure understanding with transformers. In *Proceedings of the IEEE/CVF Conference on Computer Vision and Pattern Recognition*, pages 4614–4623, 2022. 4
- [30] Nibal Nayef, Fei Yin, Imen Bizid, Hyunsoo Choi, Yuan Feng, Dimosthenis Karatzas, Zhenbo Luo, Umapada Pal, Christophe Rigaud, Joseph Chazalon, et al. Icdar2017 robust reading challenge on multi-lingual scene text detection and script identification-rrc-mlt. In *2017 14th IAPR International Conference on Document Analysis and Recognition (ICDAR)*, volume 1, pages 1454–1459. IEEE, 2017. 4
- [31] Seunghyun Park, Seung Shin, Bado Lee, Junyeop Lee, Jaeheung Surh, Minjoon Seo, and Hwalsuk Lee. Cord: a consolidated receipt dataset for post-ocr parsing. In *Workshop on Document Intelligence at NeurIPS 2019*, 2019. 2, 3, 4
- [32] Dezhi Peng, Xinyu Wang, Yulian Liu, Jiaxin Zhang, Mingxin Huang, Songxuan Lai, Jing Li, Shenggao Zhu, Dahua Lin, Chunhua Shen, et al. Spts: Single-point text spotting. In *Proceedings of the 30th ACM International Conference on Multimedia*, pages 4272–4281, 2022. 4
- [33] Amanpreet Singh, Vivek Natarjan, Meet Shah, Yu Jiang, Xinlei Chen, Devi Parikh, and Marcus Rohrbach. Towards vqa models that can read. In *Proceedings of the IEEE Conference on Computer Vision and Pattern Recognition*, pages 8317–8326, 2019. 2, 3, 4
- [34] Amanpreet Singh, Guan Pang, Mandy Toh, Jing Huang, Wojciech Galuba, and Tal Hassner. Textocr: Towards large-scale end-to-end reasoning for arbitrary-shaped scene text. In *Proceedings of the IEEE/CVF conference on computer vision and pattern recognition*, pages 8802–8812, 2021. 3
- [35] Zineng Tang, Ziyi Yang, Guoxin Wang, Yuwei Fang, Yang Liu, Chenguang Zhu, Michael Zeng, Cha Zhang, and Mohit Bansal. Unifying vision, text, and layout for universal document processing. In *Proceedings of the IEEE/CVF Conference on Computer Vision and Pattern Recognition*, pages 19254–19264, 2023. 3, 4
- [36] Laurens van der Maaten and Geoffrey Hinton. Visualizing data using t-sne. *Journal of Machine Learning Research*, 9(86):2579–2605, 2008. 1, 5
- [37] Jianfeng Wang, Zhengyuan Yang, Xiaowei Hu, Linjie Li, Kevin Lin, Zhe Gan, Zicheng Liu, Ce Liu, and Lijuan Wang. Git: A generative image-to-text transformer for vision and language. *arXiv preprint arXiv:2205.14100*, 2022. 3, 4
- [38] Xiang Zhang, Yongwen Su, Subarna Tripathi, and Zhuowen Tu. Text spotting transformers. In *Proceedings of the IEEE/CVF Conference on Computer Vision and Pattern Recognition*, pages 9519–9528, 2022. 4
- [39] Xu Zhong, Elaheh ShafieiBavani, and Antonio Jimeno Yepes. Image-based table recognition: data, model, and evaluation. In *European Conference on Computer Vision*, pages 564–580. Springer, 2020. 3, 4
- [40] Xu Zhong, Jianbin Tang, and Antonio Jimeno Yepes. Publaynet: largest dataset ever for document layout analysis. In *2019 International Conference on Document Analysis and Recognition (ICDAR)*, pages 1015–1022. IEEE, 2019. 3, 4, 5

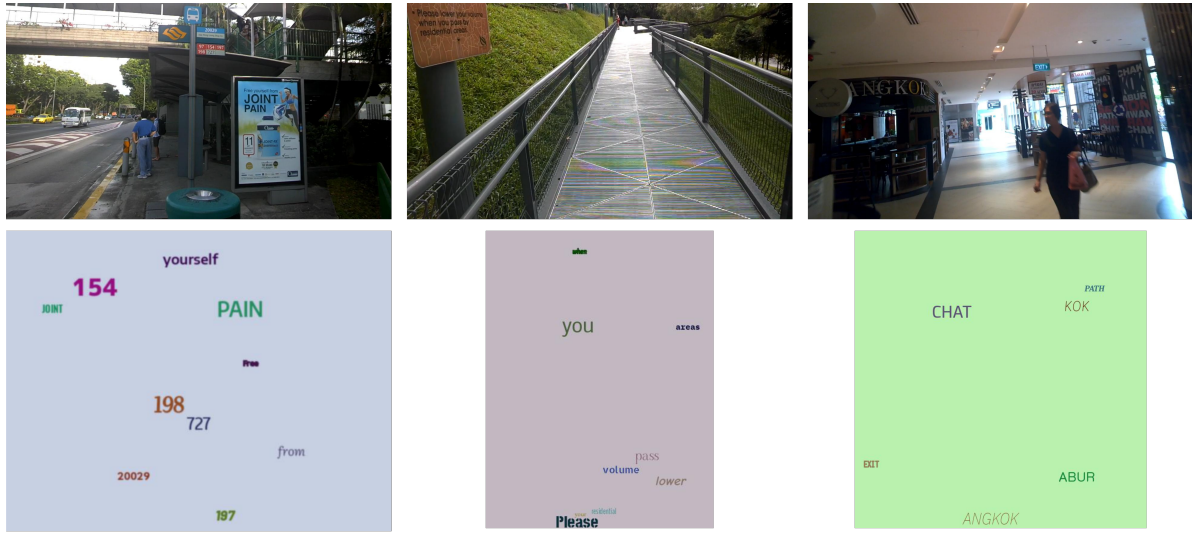

Figure 3. The visualization of images generated in a one-to-one correspondence to the ICDAR2015 test set using the proposed online renderer.

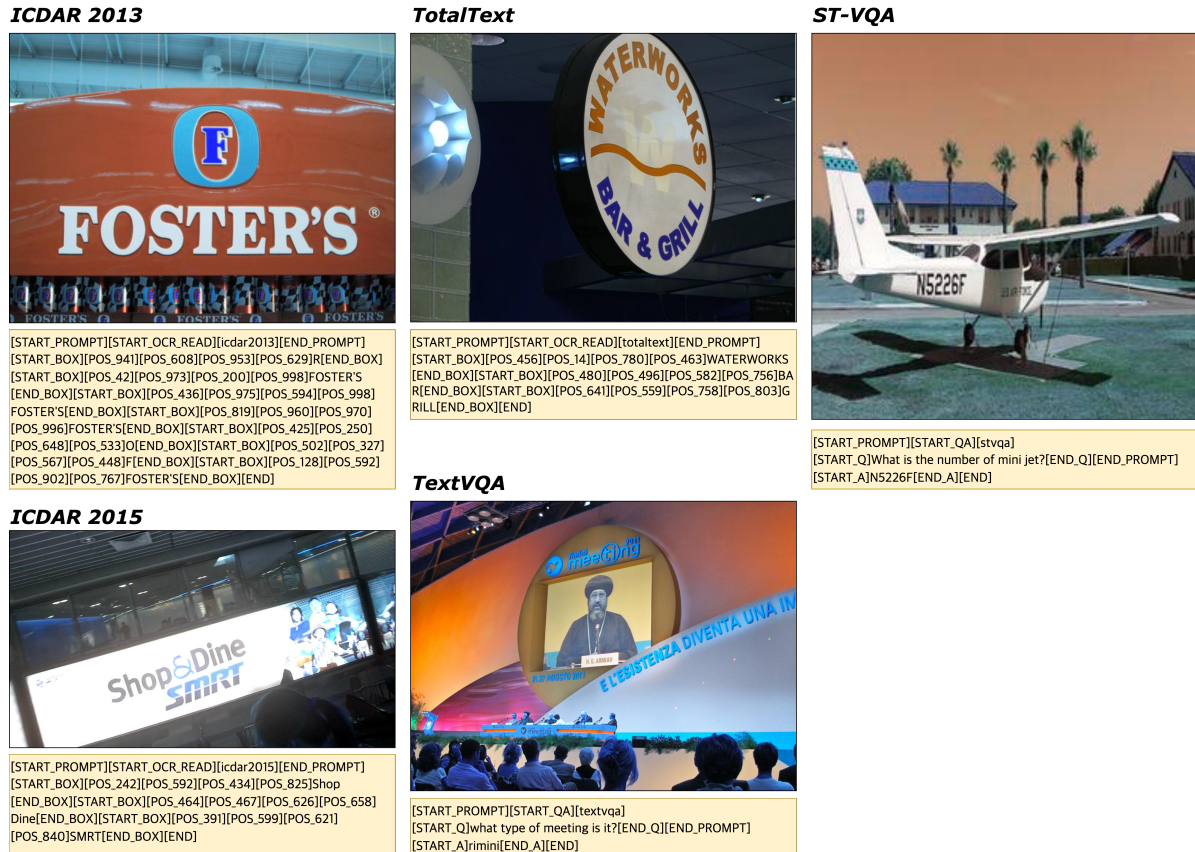

Figure 4. Examples of STU tasks. We provide a sample image for each dataset and its ground truth sequence.

| Primer name         | Primer sequence (5'-3') |
|---------------------|-------------------------|
| Trntrf12a sense     | CCGACATACAGACAGGAAAGAA  |
| Trntrf12a antisense | CTCCCTGCTGCTTCCAAAGATTA |
| 1.6 sense           | GGCAGCAGAGAAAGCAATATGTA |
| 1.6 antisense       | ACGAGATCAAGCAACCAAGAA   |
| Cd3a1 sense         | GGGAGGATGAGTCTTTTATGAGC |
| Cd3a1 antisense     | CAAGTGTAGAGAGGCTGTGGG   |
| Trn32g2 sense       | TACGGCTGCTACTCTGCGG     |
| Trn32g2 antisense   | GTGAGCCCGCAGGAGGAGCAT   |
| 3APDH sense         | TGGTGAAGCAGGACCTCTAG    |
| 3APDH antisense     | TGGCTGTGAATGCCACCAAG    |

**InfoVQA**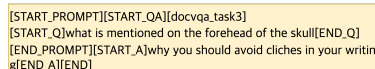

Confidential

BUREAU OF INVESTIGATION

DATE: 1/8/58

SUBJECT: *EX 614*

FORWARDED RELATION DATE: *for response*

FOR RELATION TO:

CONTACT: *P. Carter*

ROUTE TO:

| NAME           | Initials  | Date           |
|----------------|-----------|----------------|
| PEGGY CARTER   | <i>PC</i> | <i>1/14/58</i> |
| DAVID PAPER    | <i>DP</i> |                |
| DAVID FINEAL   | <i>DF</i> |                |
| TEA GELICOM    | <i>TE</i> |                |
| DIANE JACOBSON | <i>DJ</i> |                |
| ED STEINBERG   | <i>ES</i> |                |
| TEA ZANDER     | <i>TZ</i> |                |

Return to Peggy Carter, RM, 14 Reynolds Building

L-100 2075

**PubLayNet**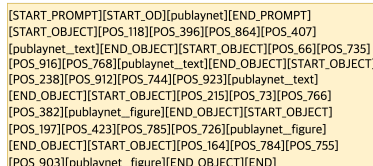

A receipt from 'Kopi Bali' showing a list of items: PB 1, TEH/ES, and BAYAR. The total amount is 7.727. The receipt is dated 12/12/2012 and includes a QR code.

***RVL-CDIP***

```
[START_PROMPT][START_CLASSIFICATION][rvl_cdi][END_PROMPT]
[START_CLASS][rvl_cdi_resume][END_CLASS][END]
```

Figure 5. Examples of VDU tasks. We provide a sample image for each dataset and its ground truth sequence. Note that a sample image of InfoVQA dataset is too long vertically, thus we crop the answer part of the question and report that.

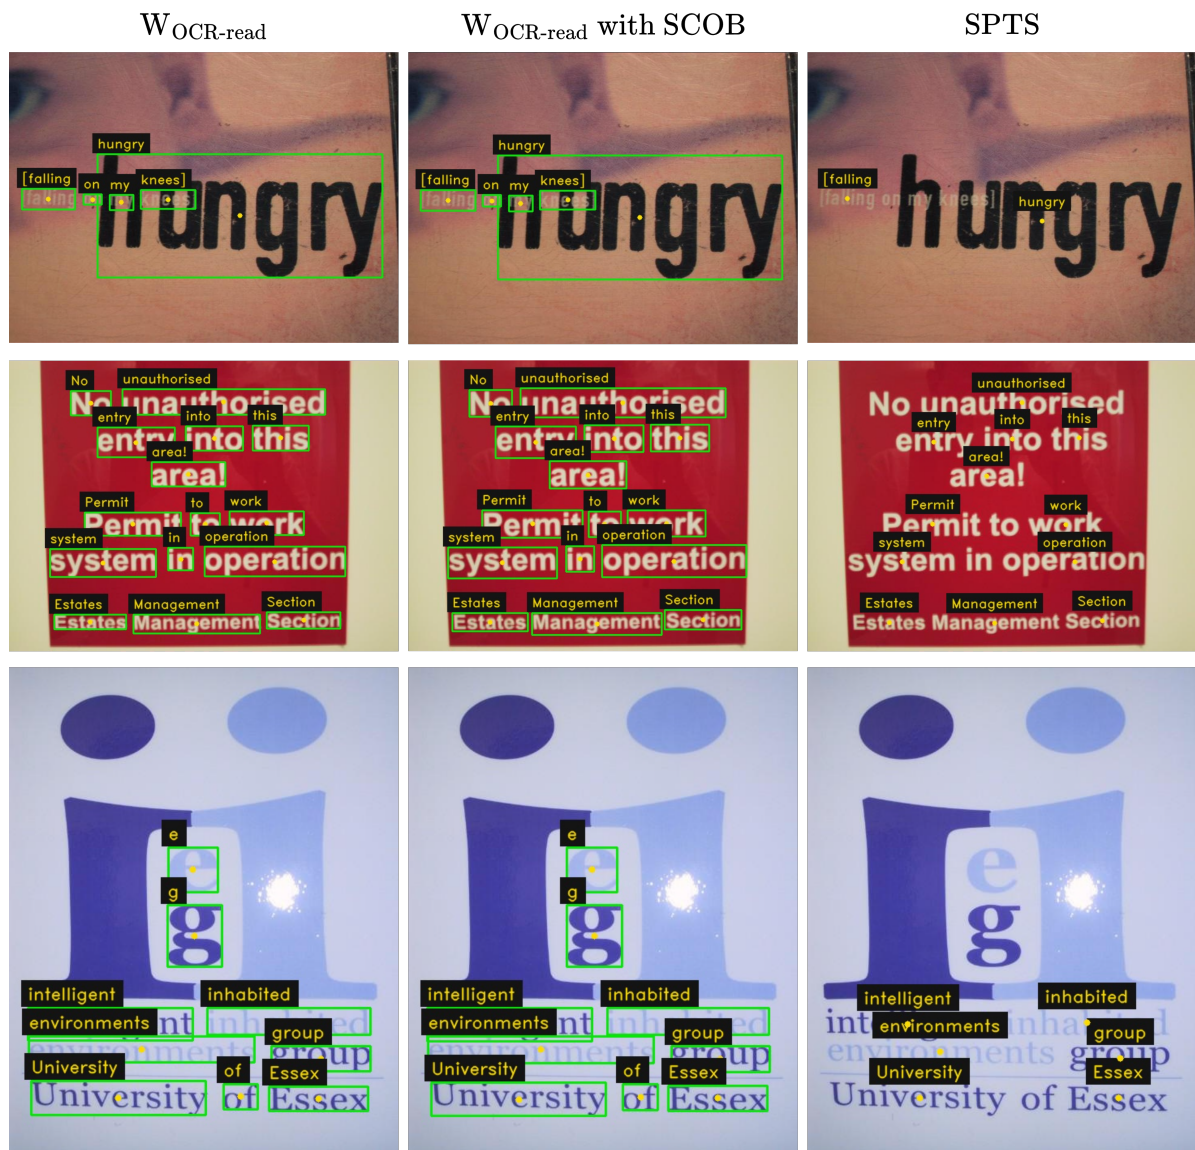

Figure 6. The visualization of OCR prediction on ICDAR2013 test set. Our  $W$  models predicts in the form of a bounding box and SPTS predicts in the form of single-points. Note that the central points of the bounding boxes predicted by our  $W$  models are displayed for comparison.

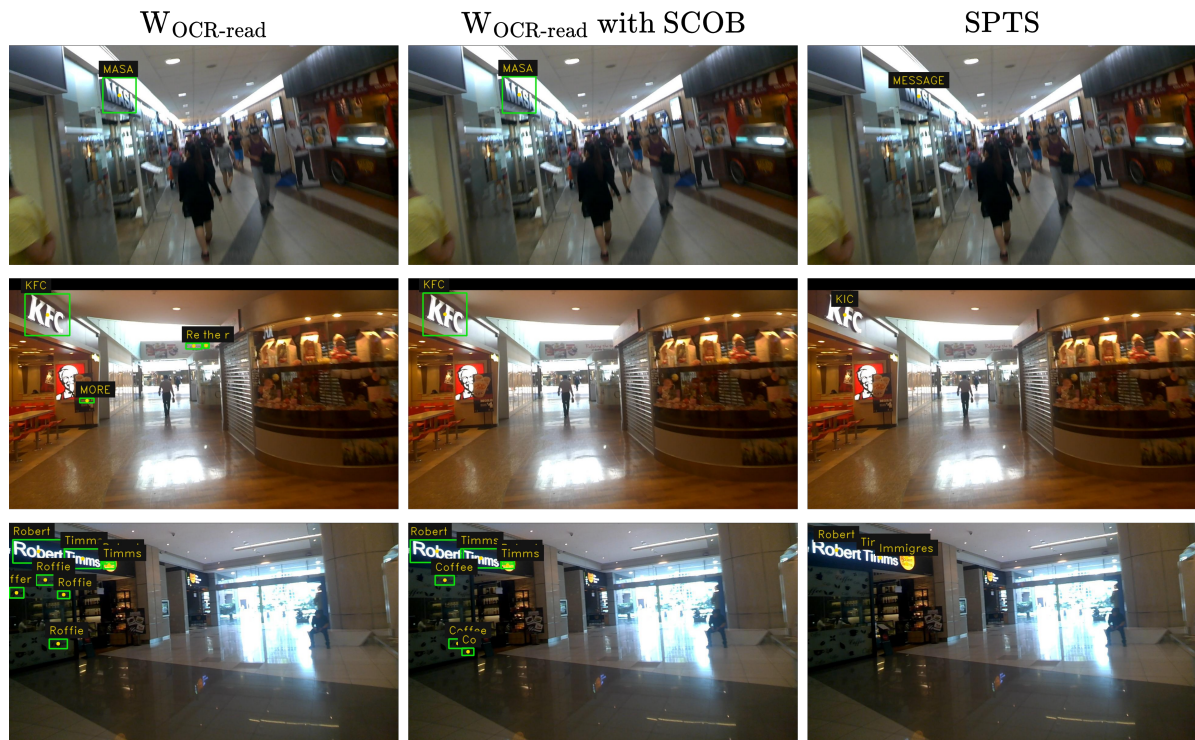

Figure 7. The visualization of OCR prediction on ICDAR2015 test set. Our  $W$  models predicts in the form of a bounding box and SPTS predicts in the form of single-points. Note that the central points of the bounding boxes predicted by our  $W$  models are displayed for comparison.

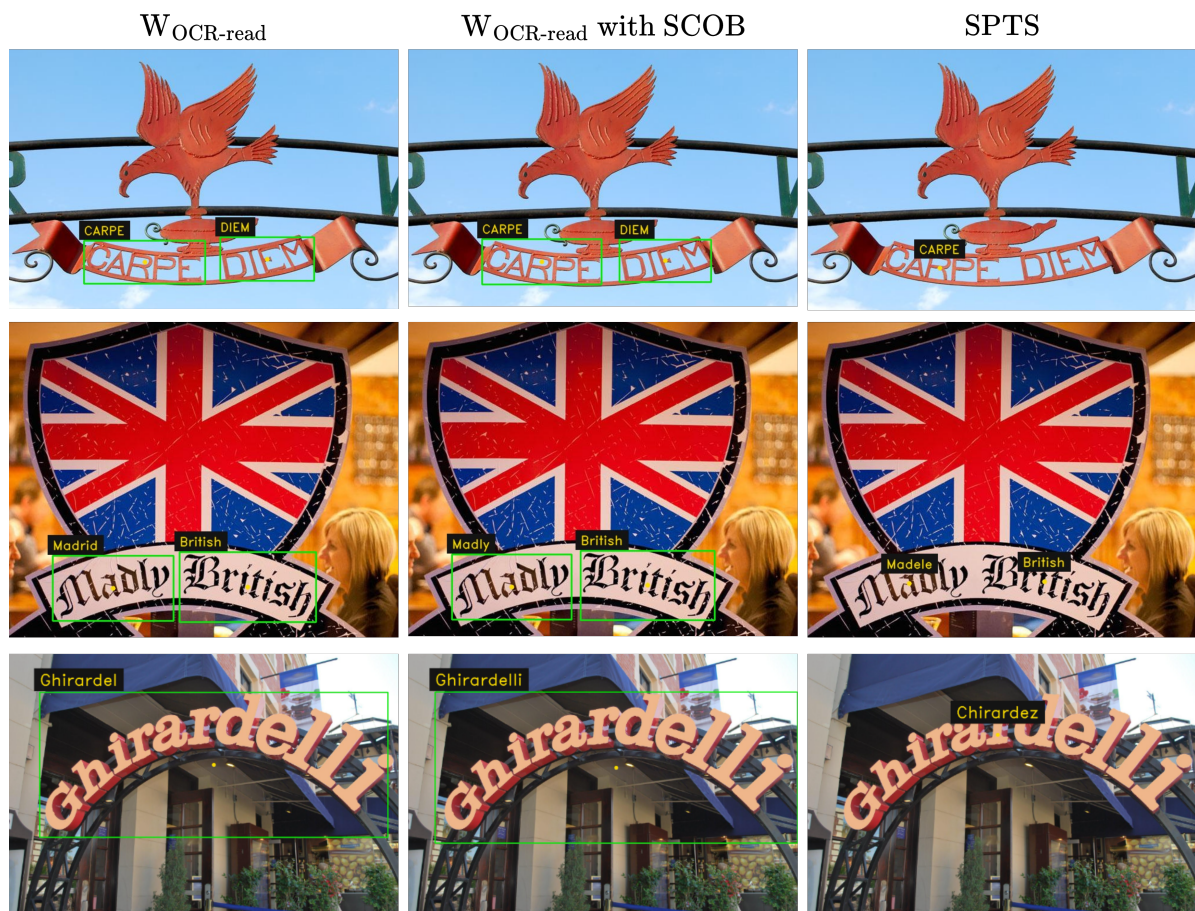

Figure 8. The visualization of OCR prediction on TotalText test set. Our  $W$  models predicts in the form of a bounding box and SPTS predicts in the form of single-point. Note that the central points of the bounding boxes predicted by our  $W$  models are displayed for comparison.

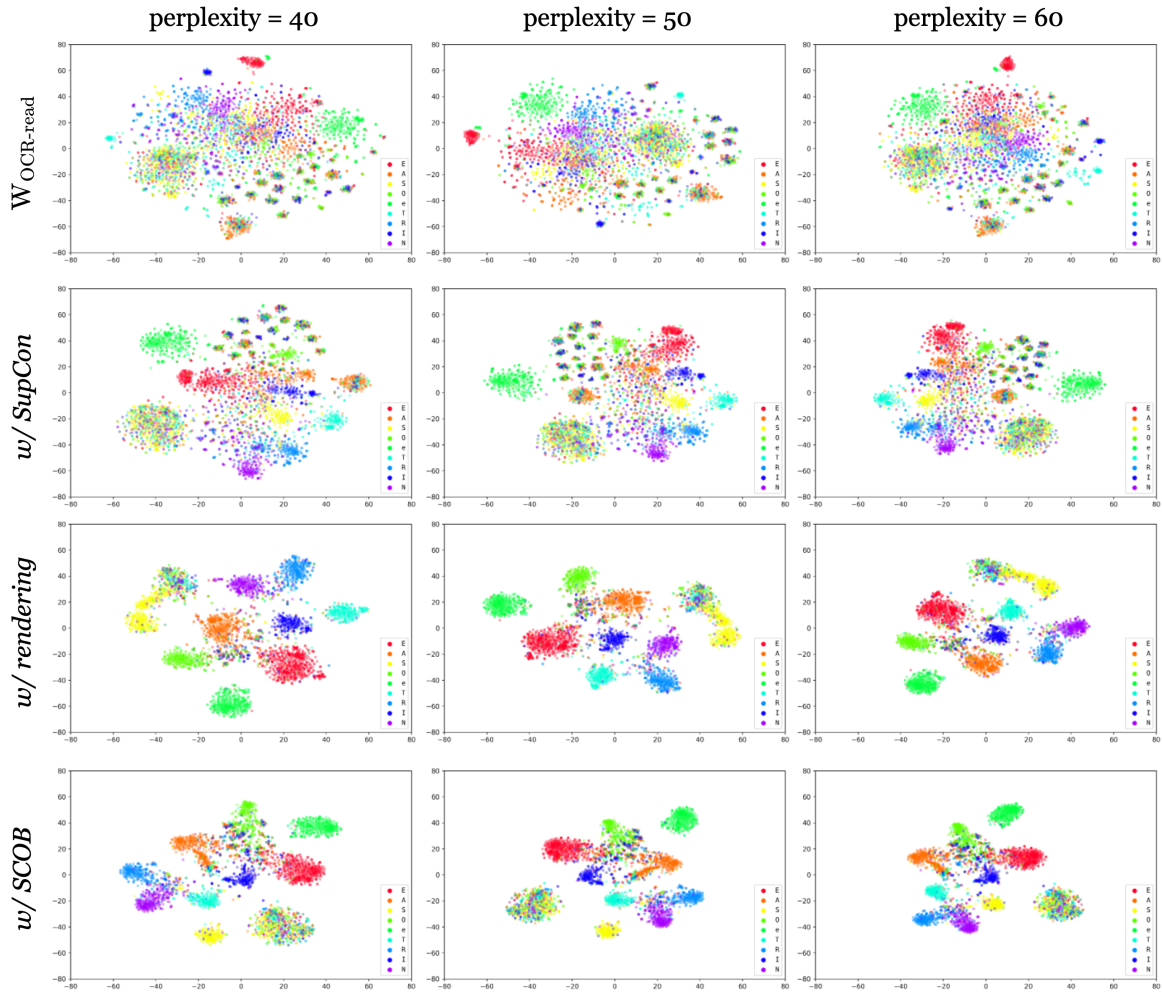

Figure 9. Examples of t-SNE visualization. We visualize representations extracted from the final layer of the decoder. Note that the models are pre-trained weights. *Data*: ICDAR2015 test set.

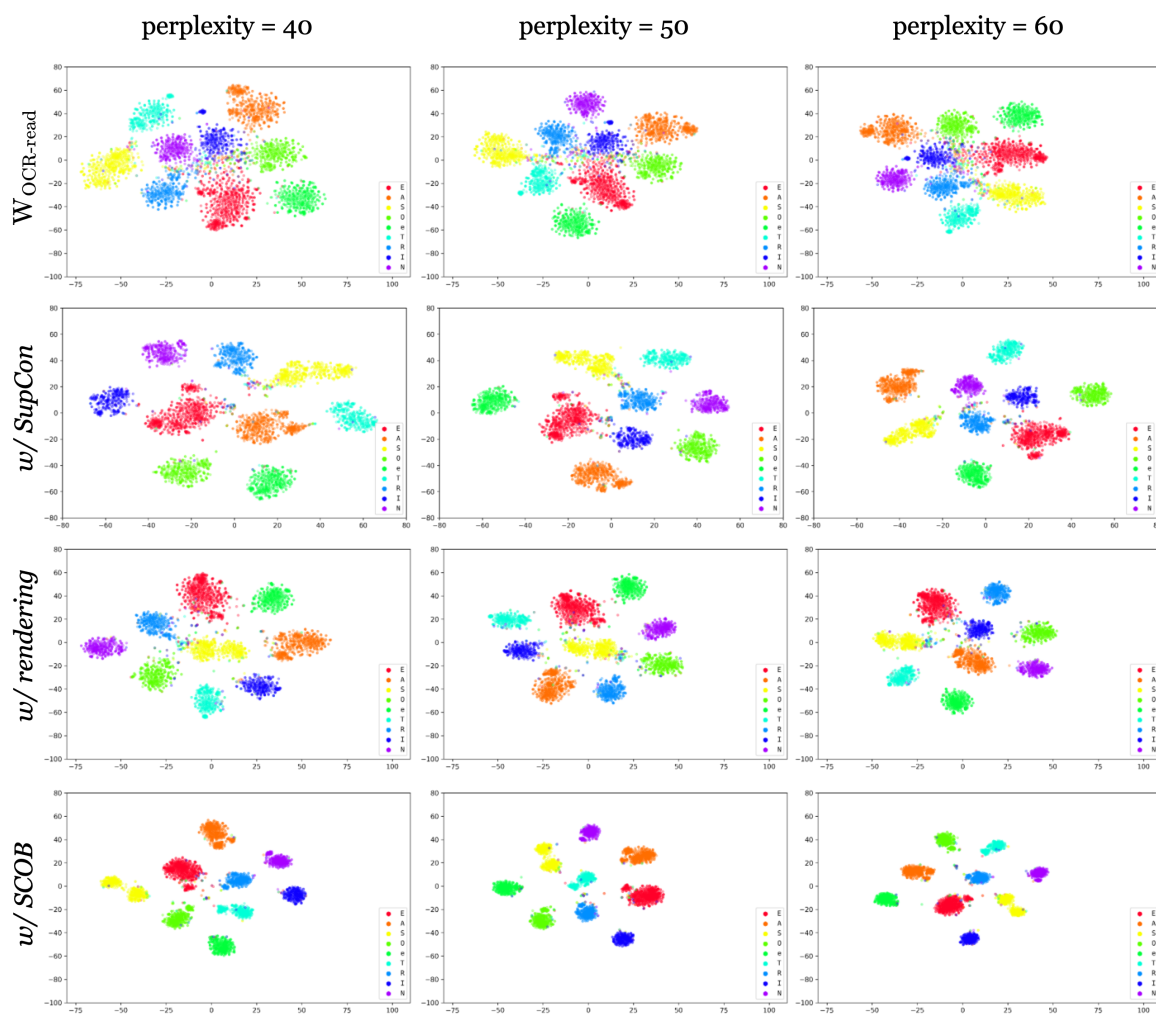

Figure 10. Examples of t-SNE visualization. We visualize representations extracted from the final layer of the decoder. The models are fine-tuned for scene text OCR. *Data*: ICDAR2015 test set.
